# Supplementary material
Source: PubMed Central journal article supplement (PMC3175586)

Supplemental Figure 1

30min

60 min

120 min

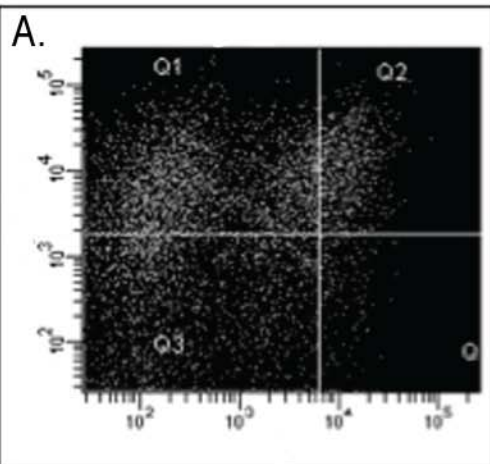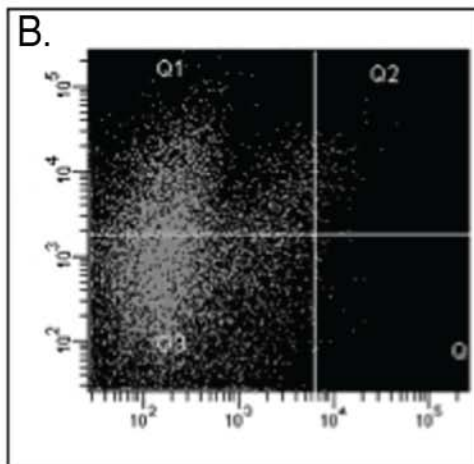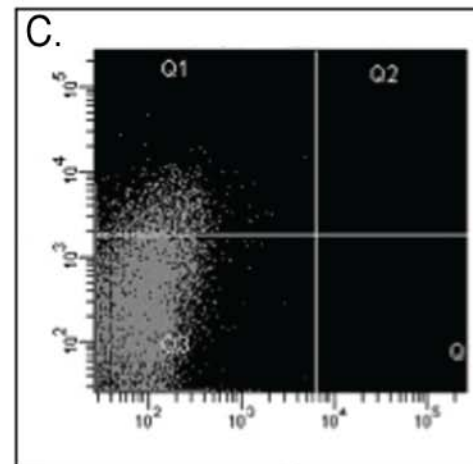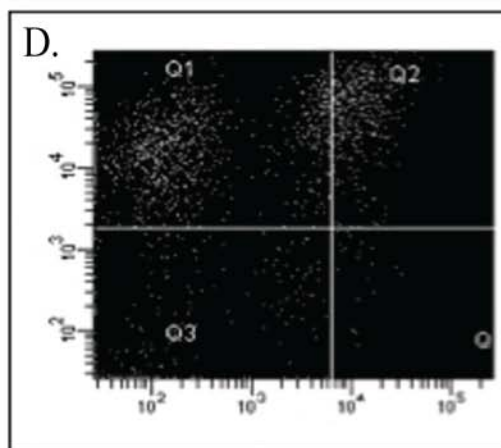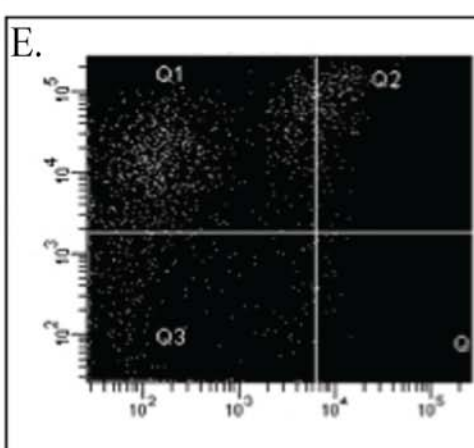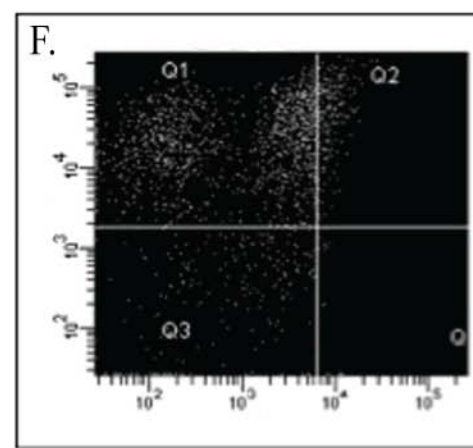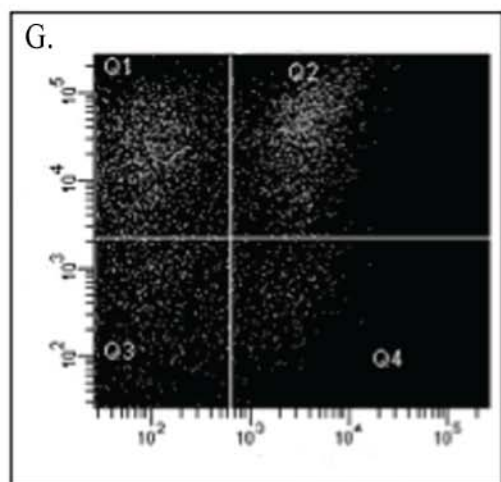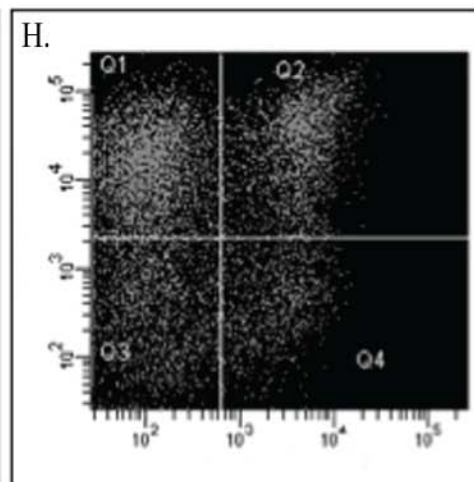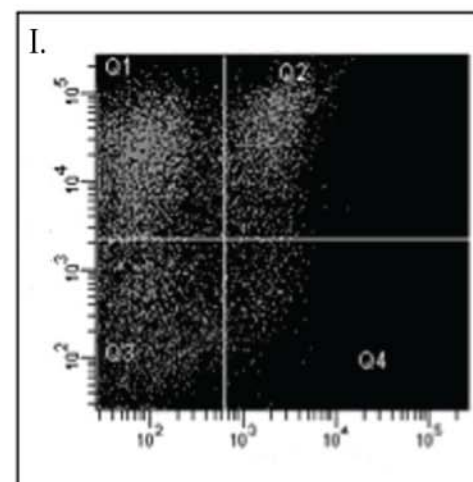

Sca1-PE

CD34-APC

Figure 2

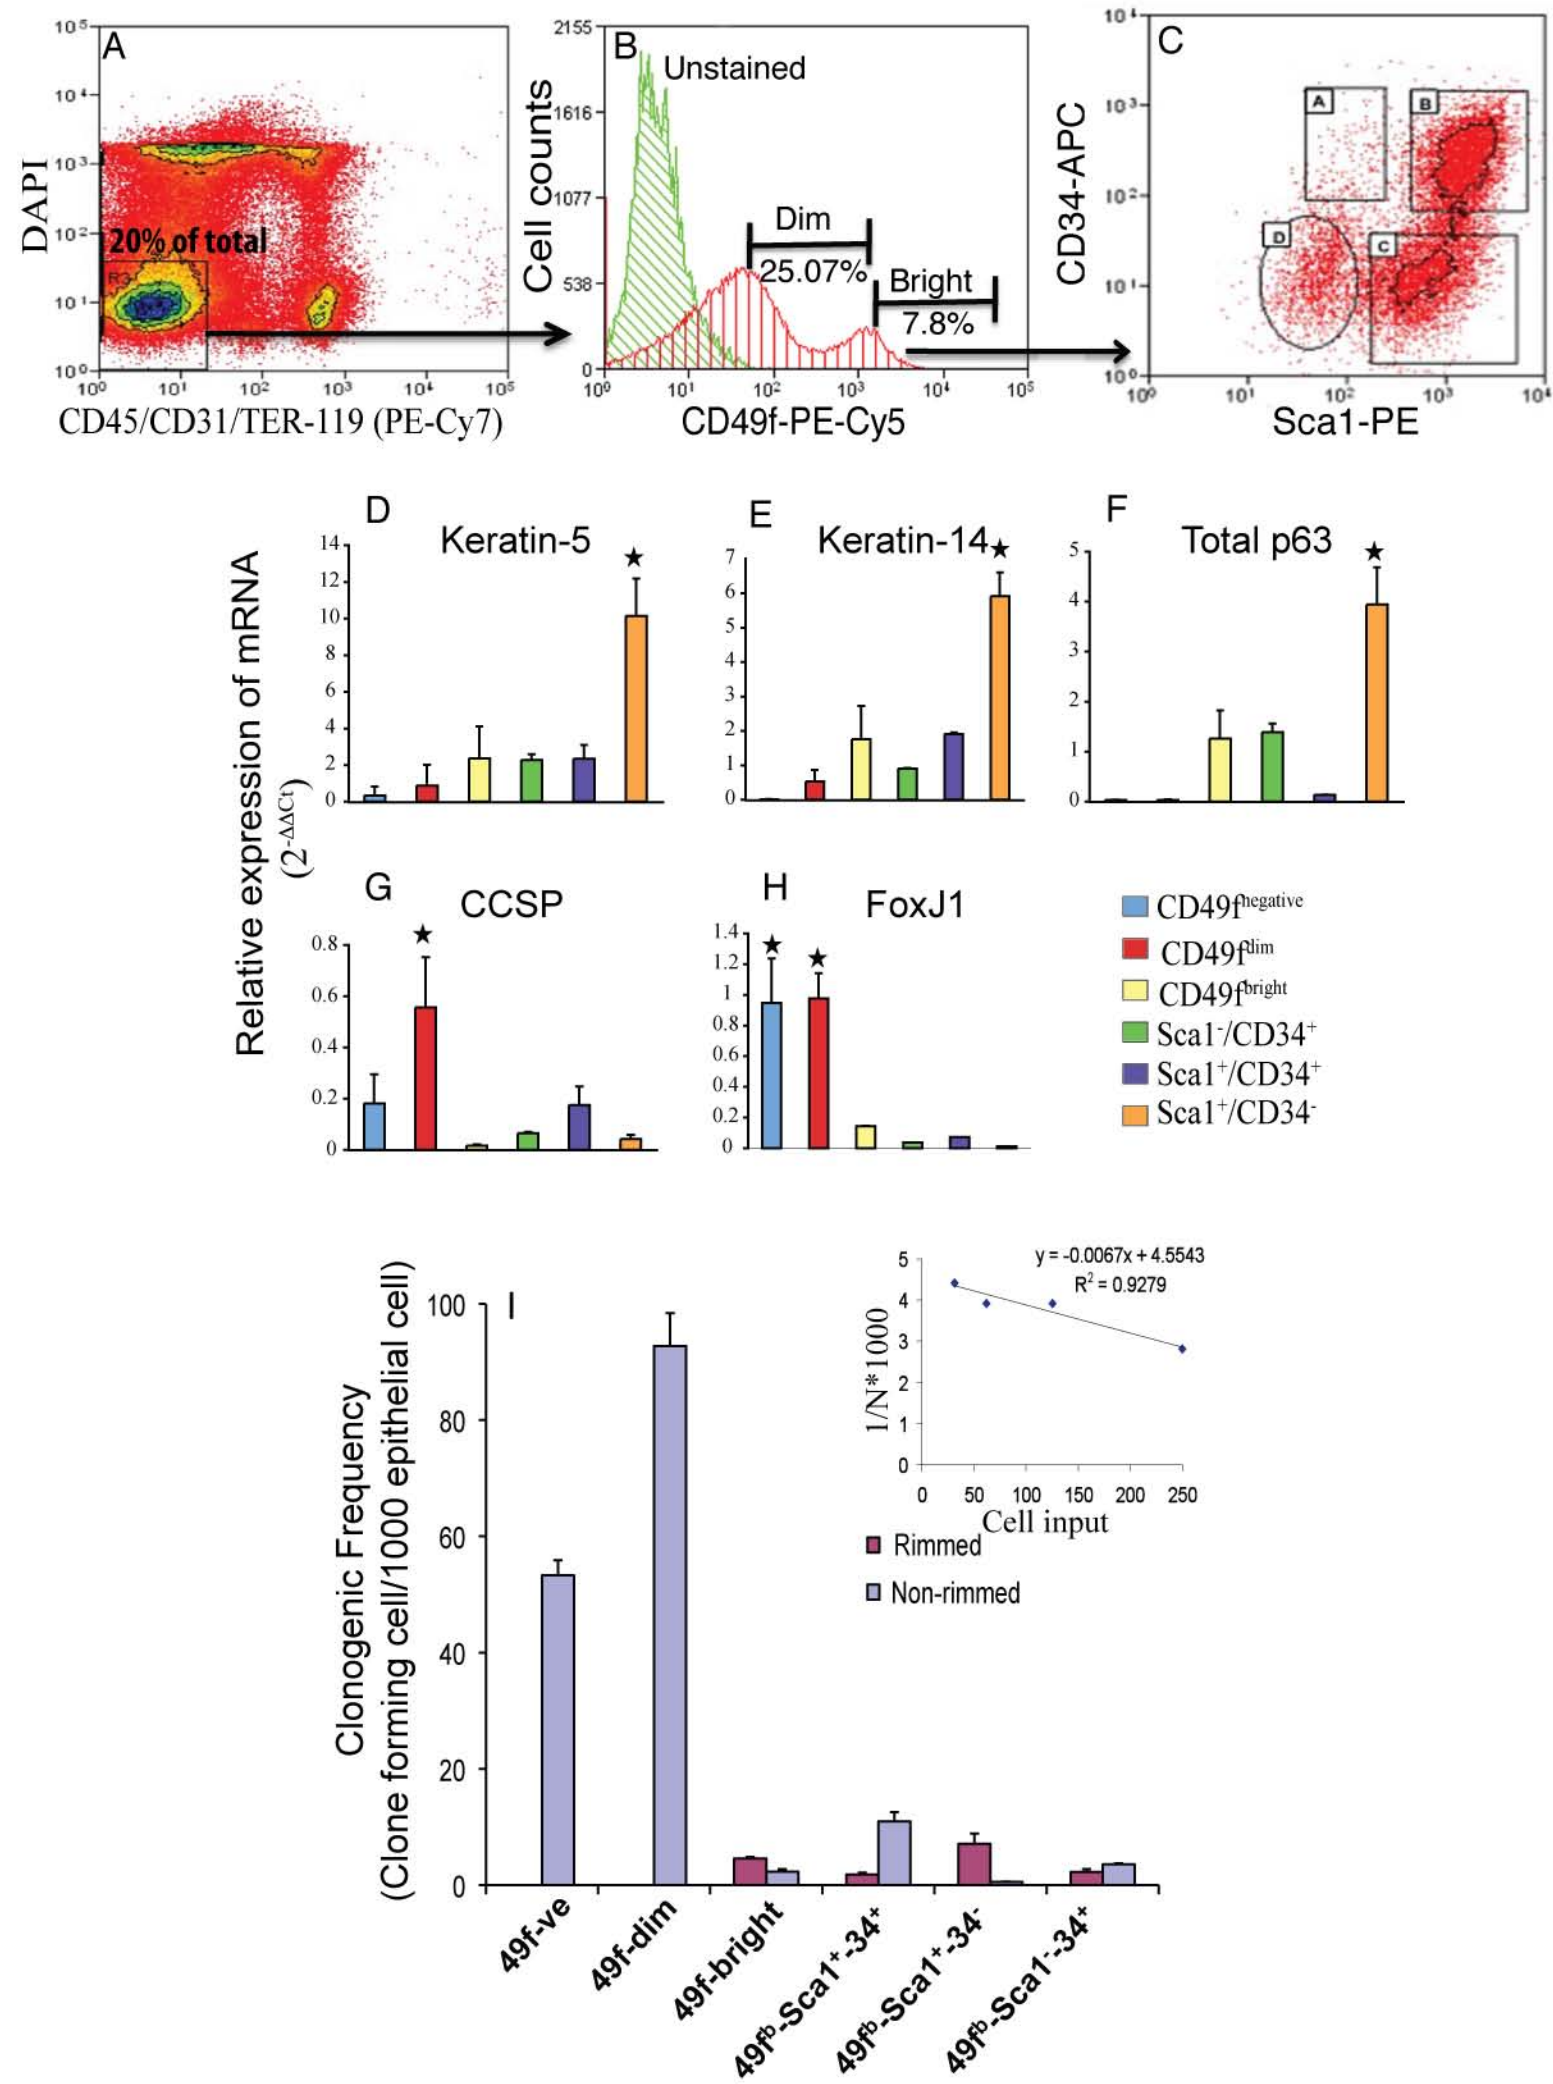

Figure 3

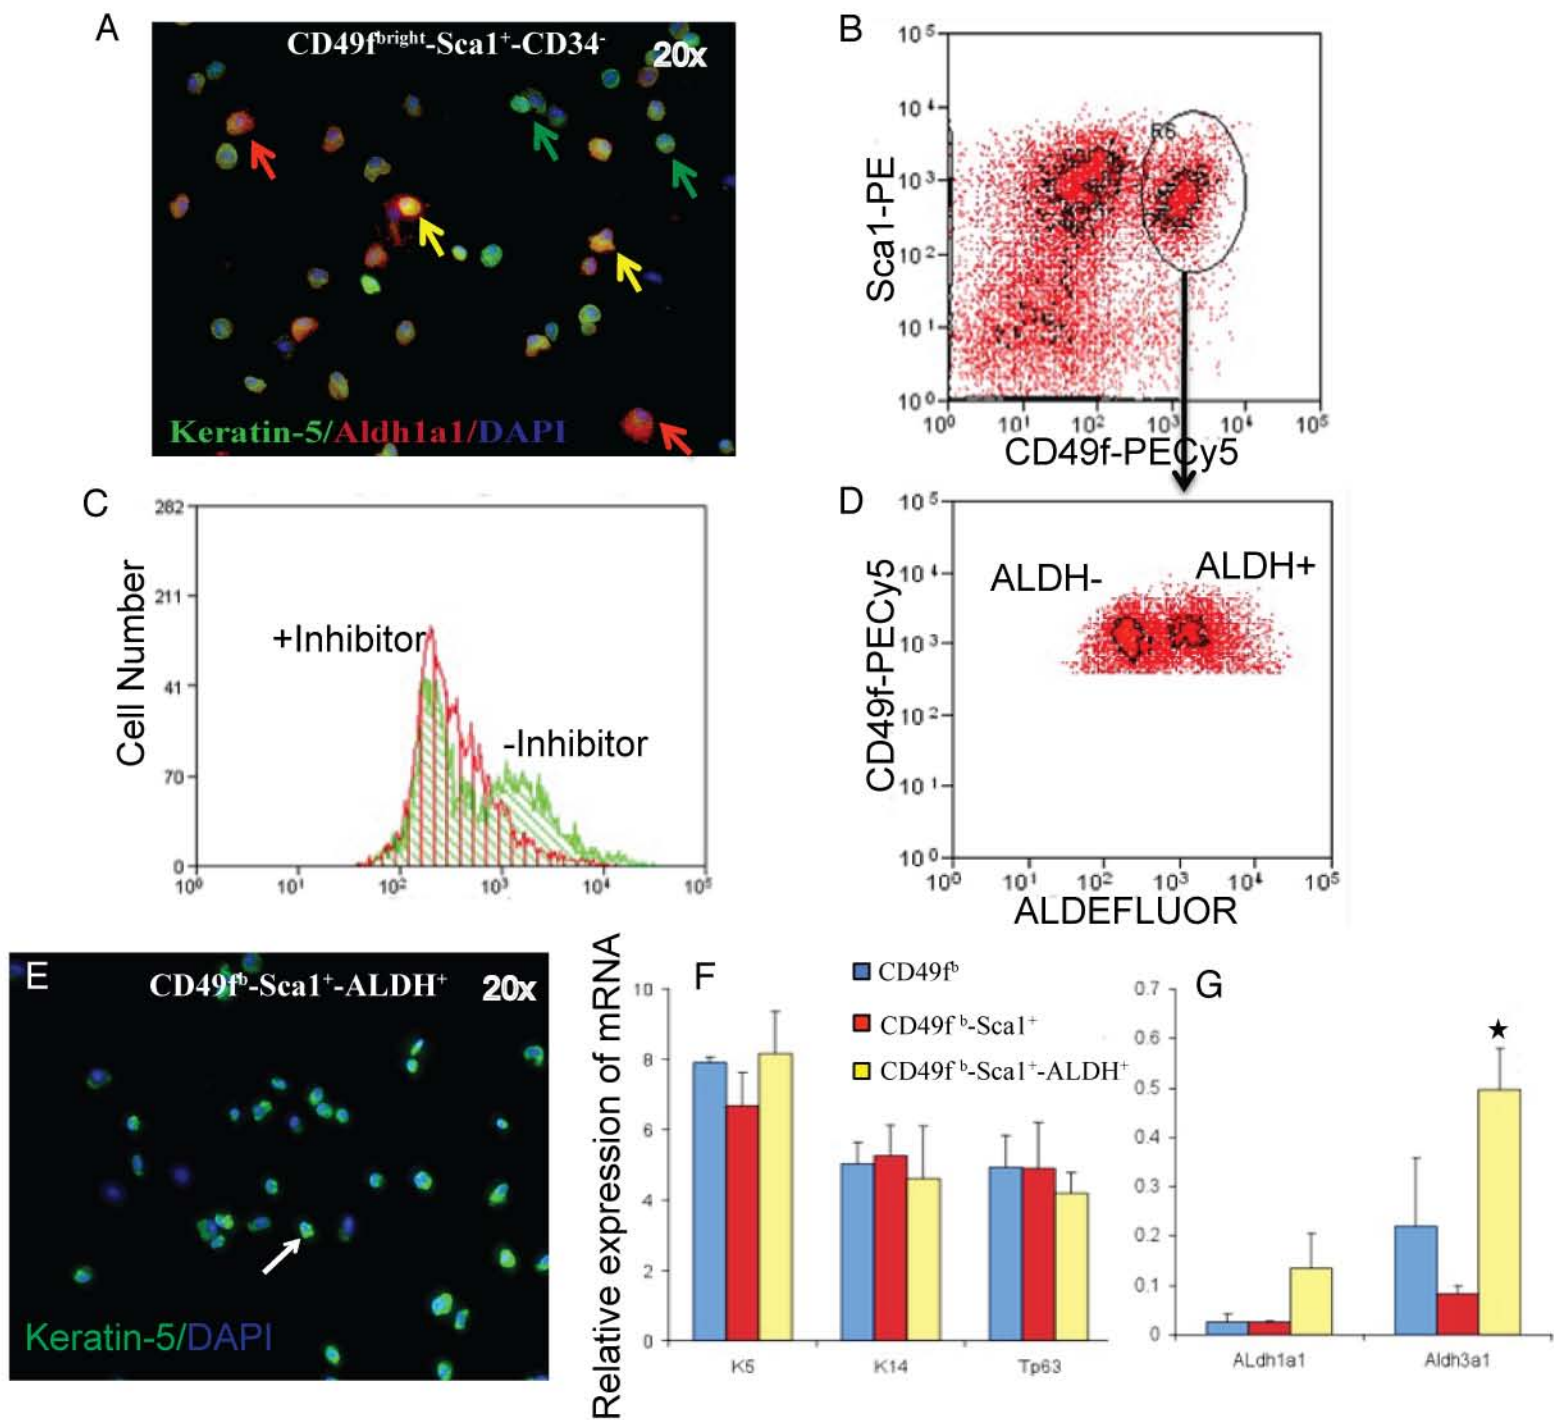

BrdU label-retention by CD49f<sup>b</sup>-Sca1<sup>+</sup>-ALDH<sup>+</sup> population:

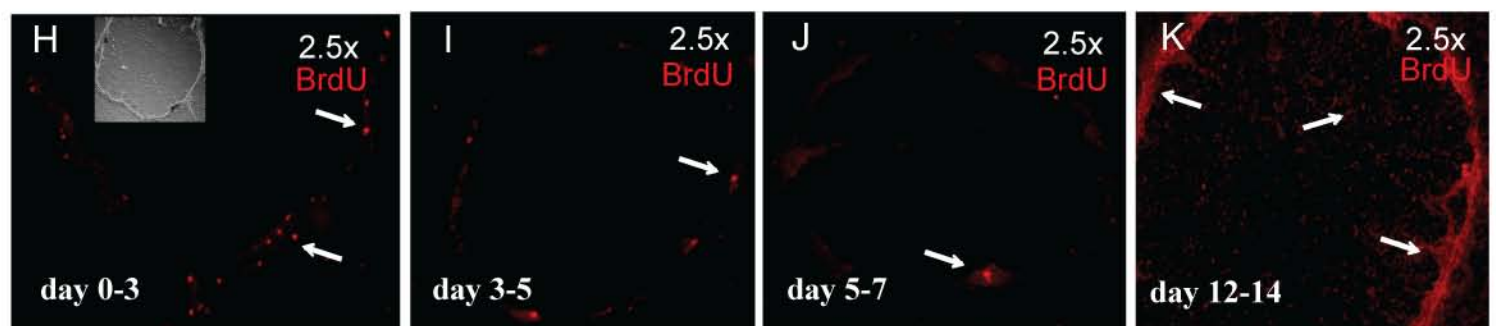

Supplemental Figure 4

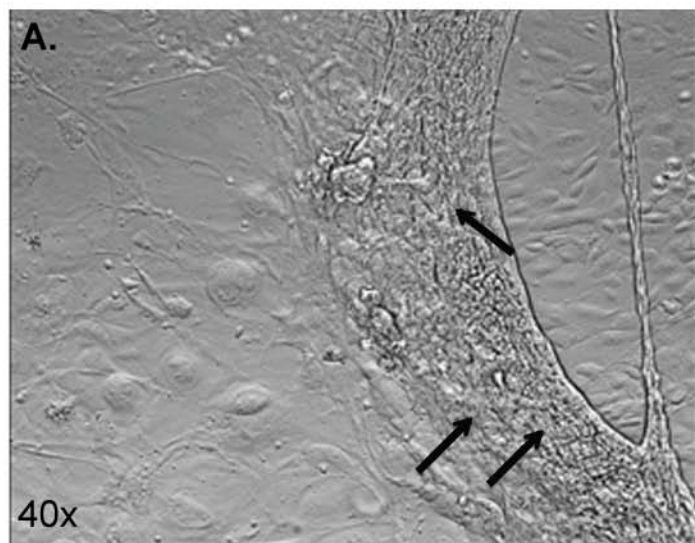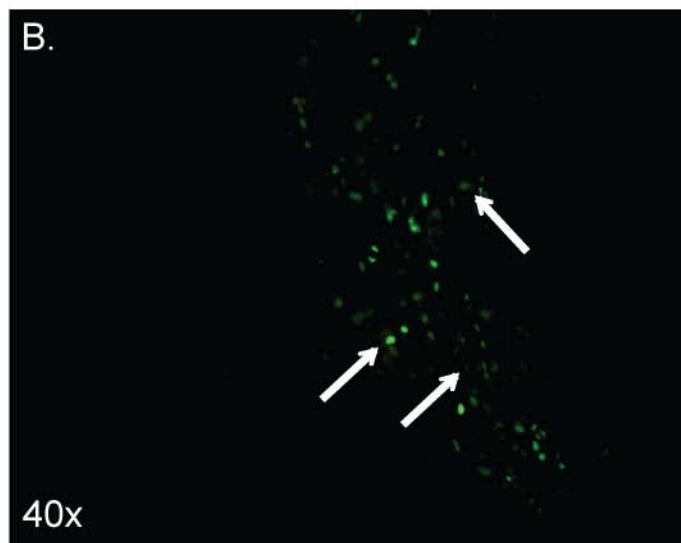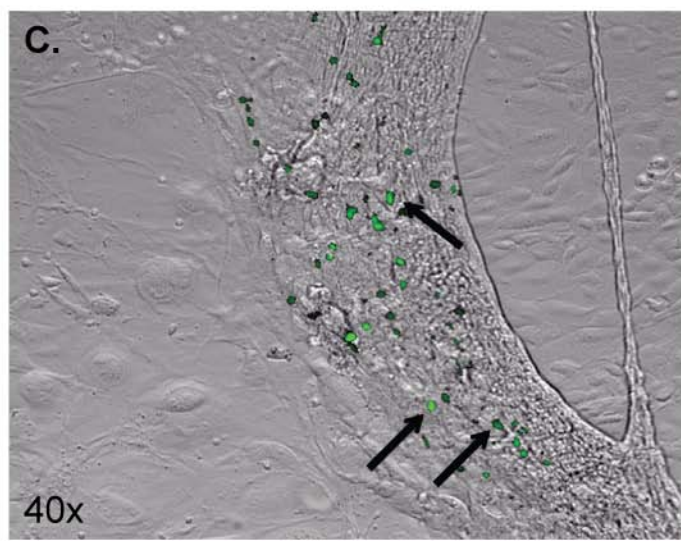

Supplemental Figure 5

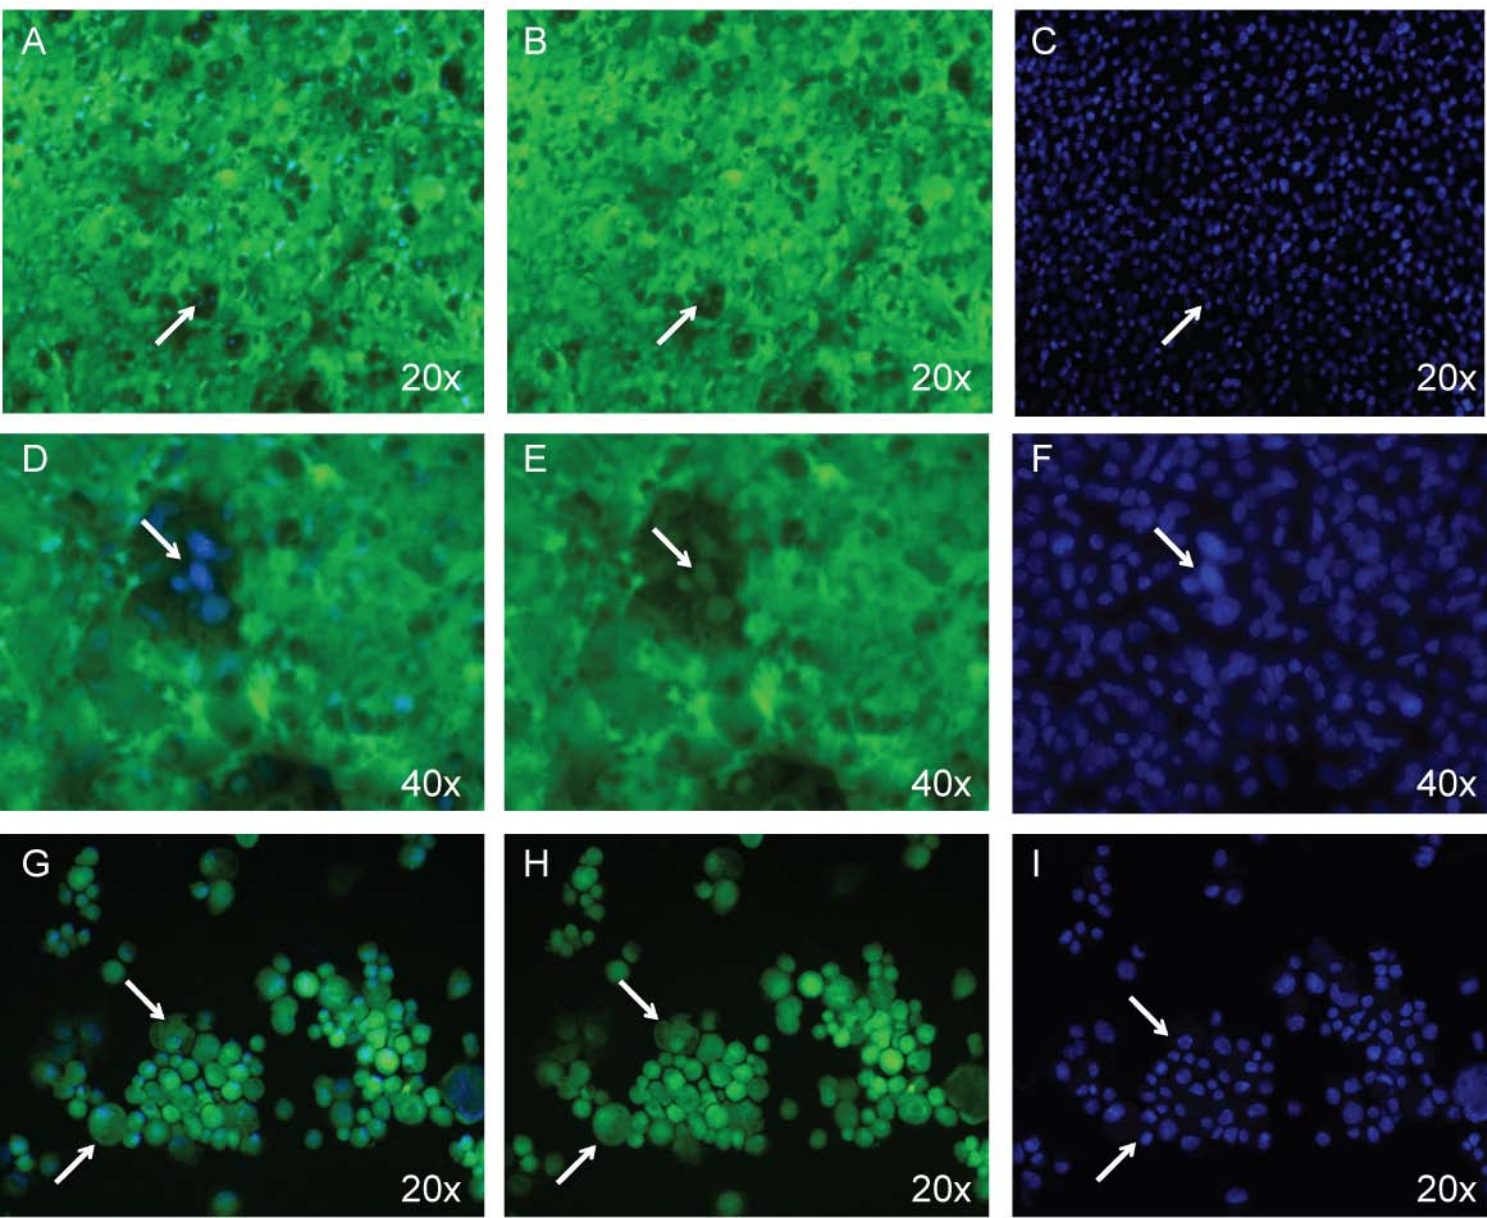

Supplemental Figure 6

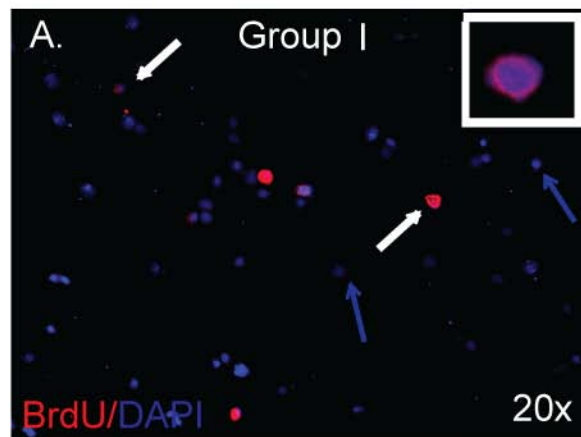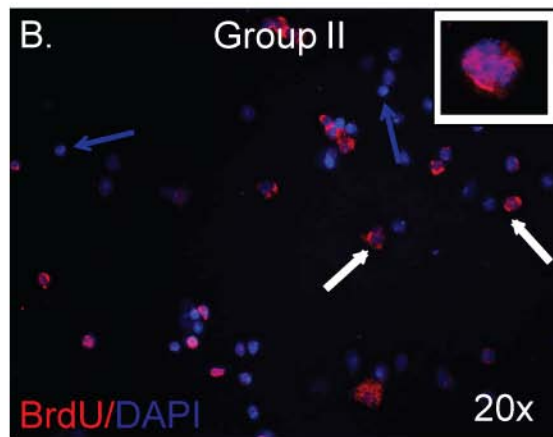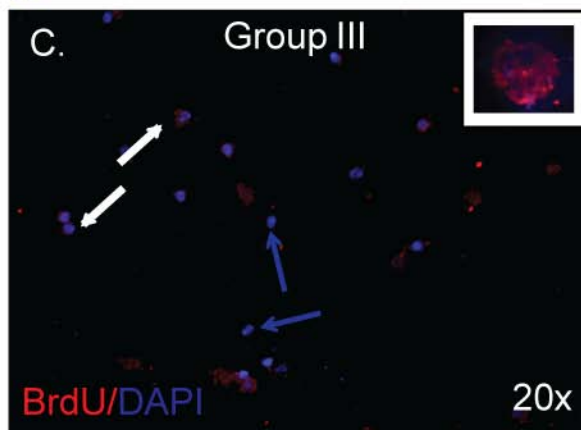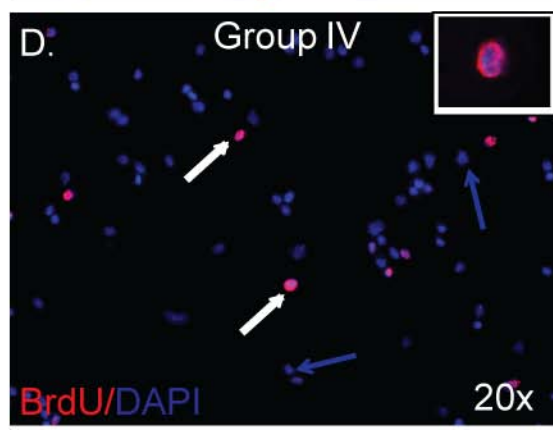

Supplement: supp_45_3_459__2.pdf [file supp_45_3_459__2.pdf]
